# Supplementary material for: Long-stable lithium metal batteries with a high-performance dual-salt solid polymer electrolyte
Source: Royal Society of Chemistry journal article supplement (doi:10.1039/d4py00741g), 2024-01-01
Supplement: d4py00741g17.pdf [file d4py00741g17.pdf]

# Long-Stable Lithium Metal Batteries with a High-Performance Dual-Salt Solid Polymer Electrolyte

## Supporting Information

### S1. Calculation of ionic conductivity

The Li-ion conductivities of the electrolytes were acquired by EIS measurements (from  $10^5$  Hz to  $10^{-2}$  Hz) at a temperature range of 20-80 °C. The ionic conductivities of the membranes were calculated according to the following equation (S1):

$$\sigma = \frac{d}{R_b A} \quad (S1)$$

where  $d$  is the film thickness,  $R_b$  is the electrolyte impedance, and  $A$  is the electrode area.

### S2. Calculation of activation energy

The activation energy is used to demonstrate the difficulty of lithium-ion transfer. It is derived using the Arrhenius equation (S2):

$$\sigma = \sigma_0 \exp\left(-\frac{E_a}{RT}\right) \quad (S2)$$

where  $E_a$  is the activation energy,  $T$  is the test temperature, and  $R$  is the Boltzmann constant.

### S3. Calculation of $\text{Li}^+$ transference numbers

The  $\text{Li}^+$  transfer numbers ( $t_{\text{Li}^+}$ ) of the electrolytes were tested using Li|SPE|Li symmetric cells.  $t_{\text{Li}^+}$  values are calculated from equation (S3):

$$t_{Li}^+ = \frac{I_{ss}(\Delta V - I_0 R_0)}{I_0(\Delta V - I_{ss} R_{ss})} \quad (S3)$$

where  $\Delta V$  is the applied polarization voltage (10 mV),  $I_0$  and  $R_0$  are the initial current and initial interface resistance respectively, and  $I_{ss}$  and  $R_{ss}$  are the post-polarization steady-state current and interface resistance respectively.

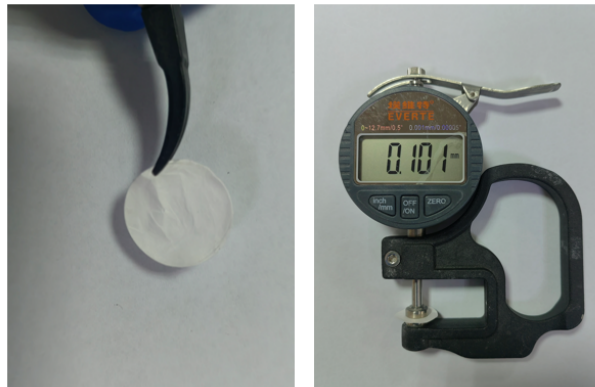

**Fig. S1.** Optical images of PVDF-HFP nanofiber membrane and the measurement of the thickness.

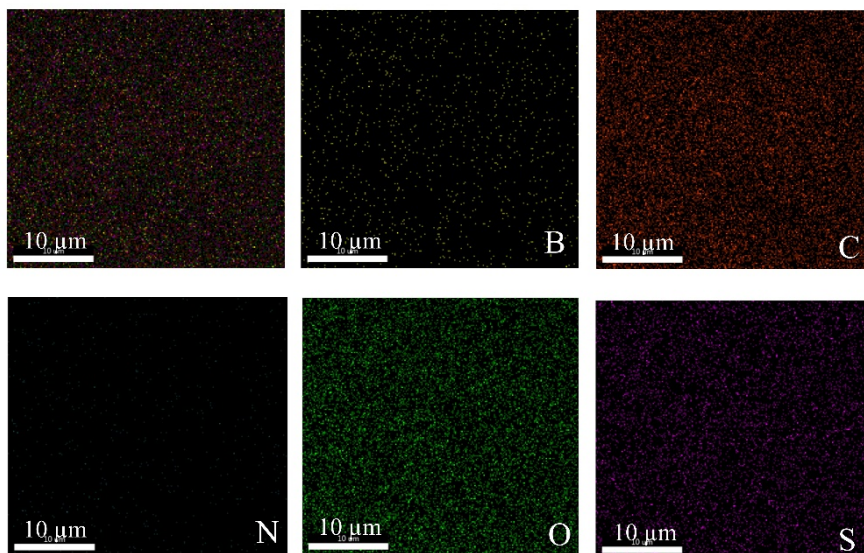

**Fig. S2.** EDS mappings of  $N_2V_8L_{1-0.1}$  SPE.

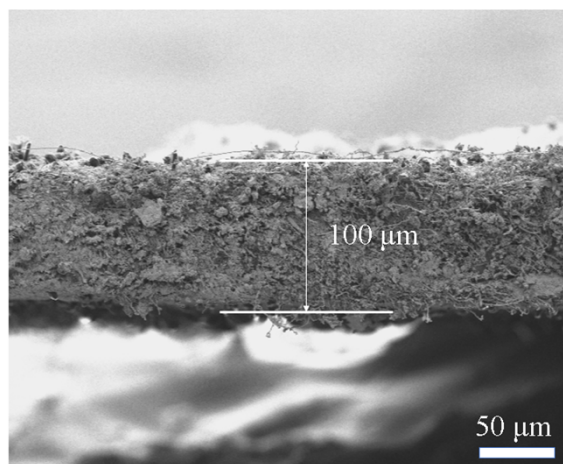

**Fig. S3.** Cross-sectional SEM image of the  $N_2V_8L_{1-0.1}$  SPE membrane.

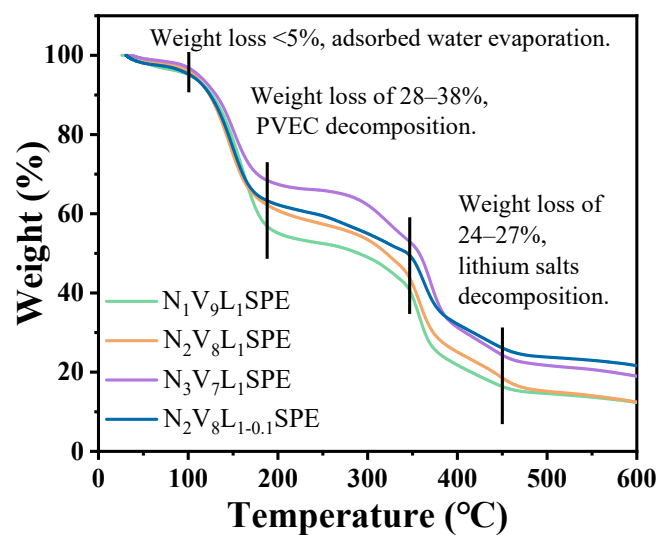

**Fig. S4.** TG curves of  $N_1V_9L_1$ ,  $N_2V_8L_1$ ,  $N_3V_7L_1$  and  $N_2V_8L_{1-0.1}$  SPEs.

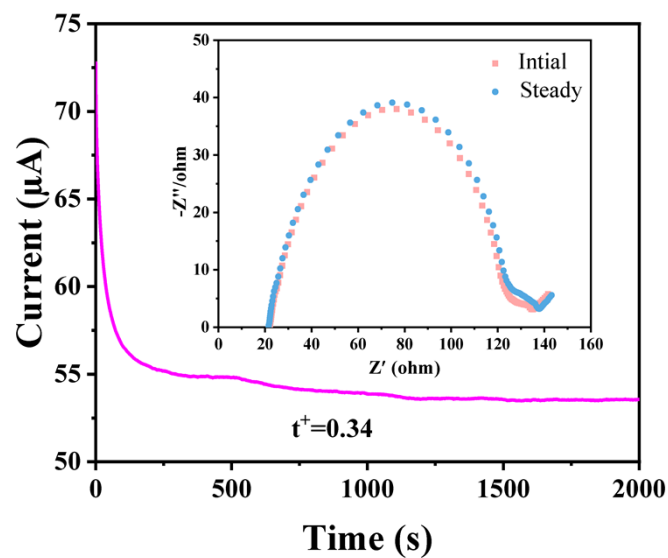

**Fig. S5.** The current-time curve for a  $\text{Li}|\text{N}_2\text{V}_8\text{L}_1 \text{ SPE}|\text{Li}$  symmetrical cell with an applied polarization voltage of 10 mV and the corresponding EIS spectra before and after polarization.

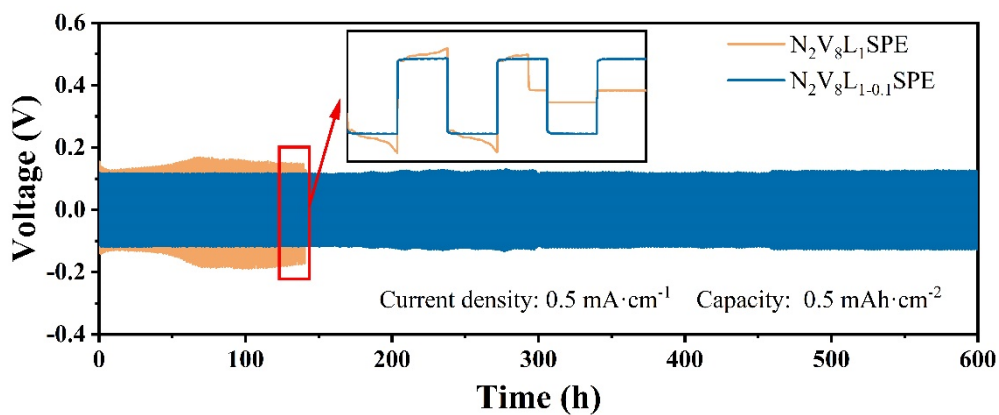

**Fig. S6.** Long-term constant current cycling plots of  $\text{Li}|\text{N}_2\text{V}_8\text{L}_1 \text{ SPE}|\text{Li}$  and  $\text{Li}|\text{N}_2\text{V}_8\text{L}_{1-0.1} \text{ SPE}|\text{Li}$  cells at  $0.5 \text{ mA cm}^{-2}$ .

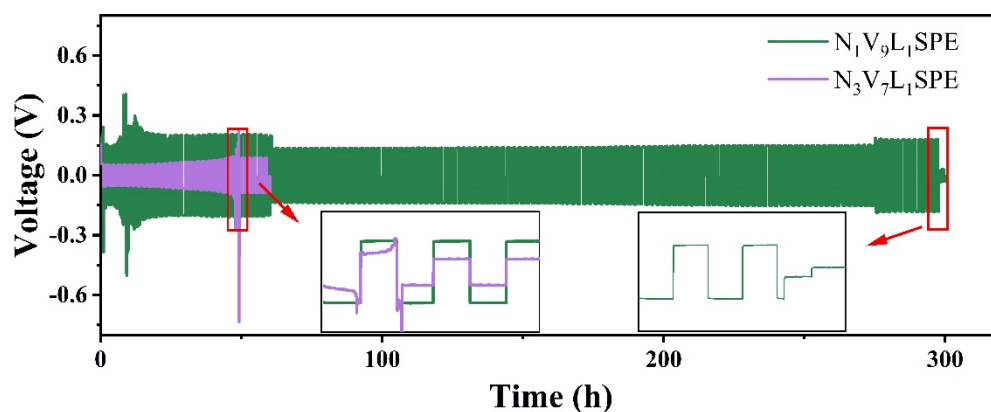

**Fig. S7.** Long-term constant current cycling of Li|SPE|Li cells with single-salt  $N_1V_9L_1$  and  $N_3V_7L_1$  SPEs at  $0.1 \text{ mA cm}^{-2}$ .

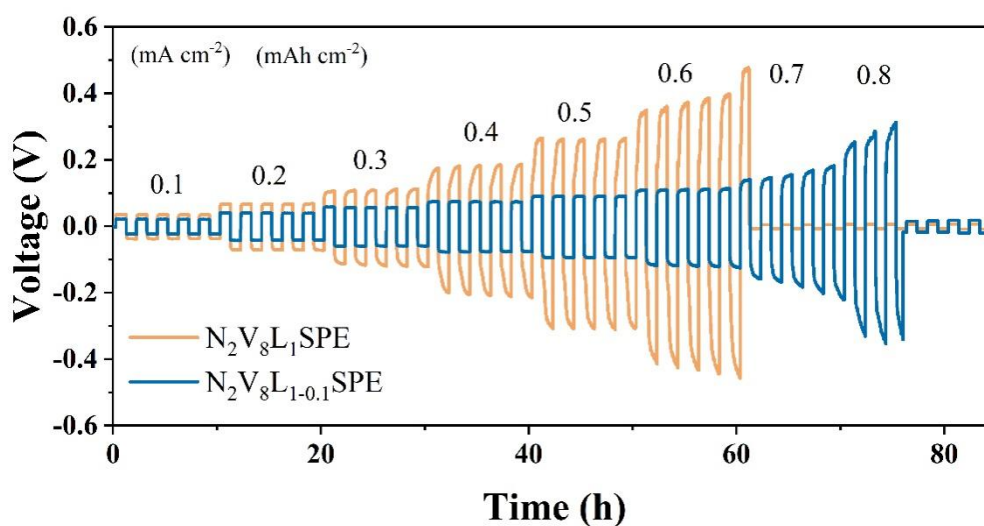

**Fig. S8.** CCD measurements of Li| $N_2V_8L_1$  SPE|Li and Li| $N_2V_8L_{1-0.1}$  SPE|Li cells.

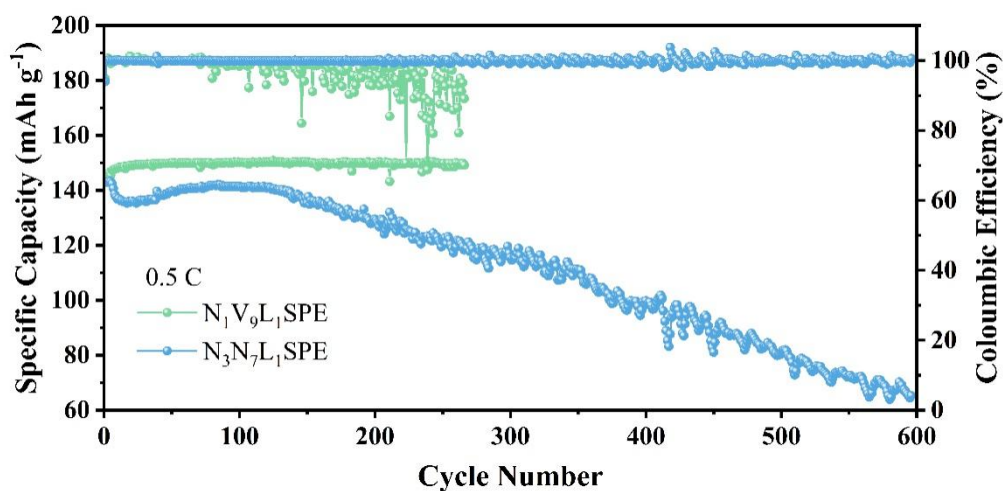

**Fig. S9.** Long-term cycling plots of Li| $N_1V_9L_1$  SPE|LFP and Li| $N_3V_7L_1$  SPE|LFP cells

at 0.5 C.

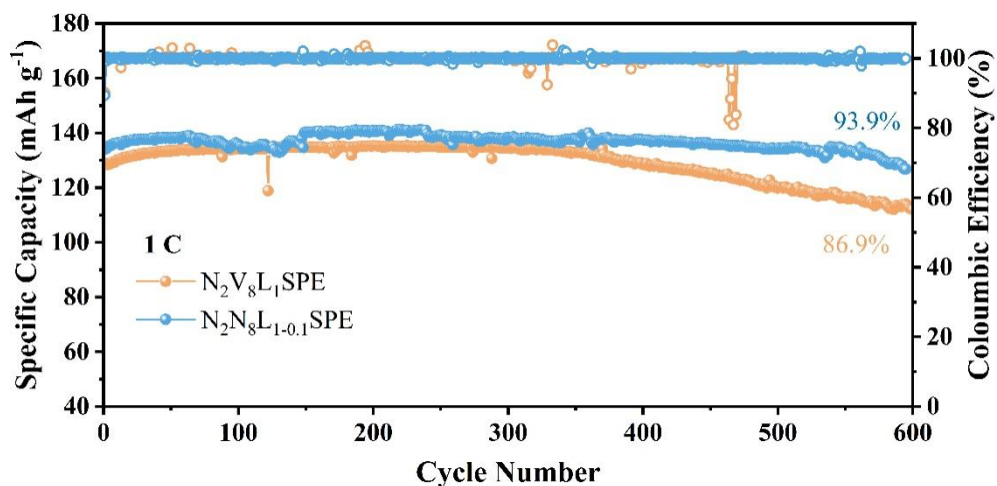

**Fig. S10.** Long-term cycling plots of Li|N<sub>2</sub>V<sub>8</sub>L<sub>1</sub> SPE|LFP and Li|N<sub>2</sub>V<sub>8</sub>L<sub>1-0.1</sub> SPE|LFP battery at 1 C.

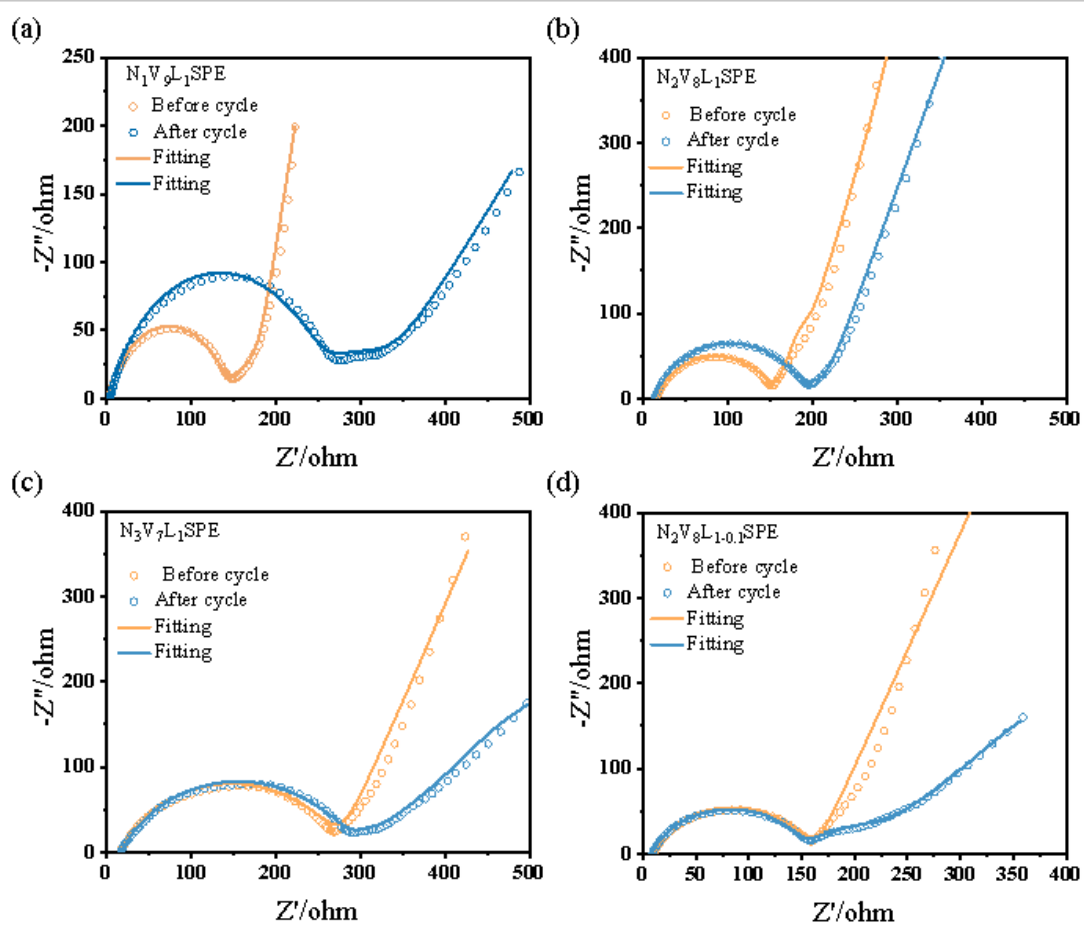

**Fig. S11.** EIS plots and the fitting curves of (a) Li|N<sub>1</sub>V<sub>9</sub>L<sub>1</sub> SPE|LFP, (b) Li|N<sub>2</sub>V<sub>8</sub>L<sub>1</sub> SPE|LFP, (c) Li|N<sub>3</sub>V<sub>7</sub>L<sub>1</sub> SPE|LFP, (d) Li|N<sub>2</sub>V<sub>8</sub>L<sub>1-0.1</sub> SPE|LFP before and after cycling.

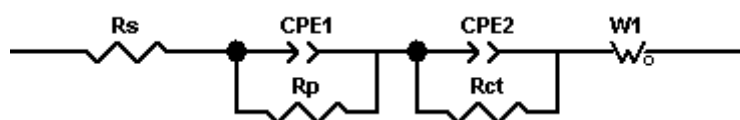

**Fig. S12.** Equivalent circuit model for EIS fitting.

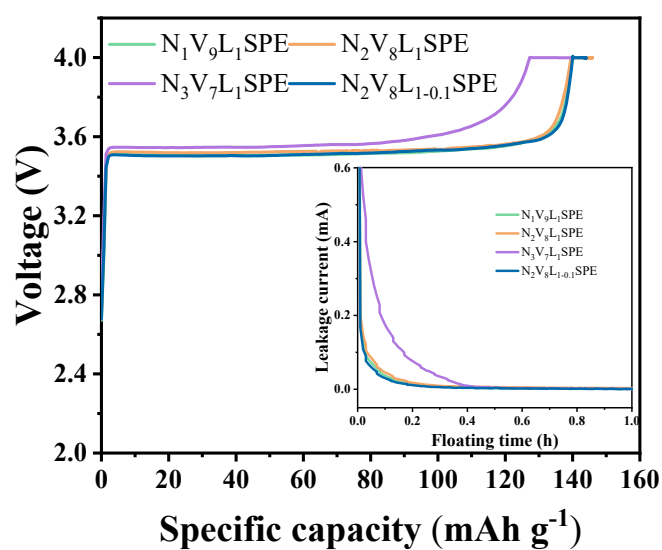

**Fig.S13.** The charge curves and leakage current plots (inset) of Li||LFP batteries with different SPEs at a constant voltage of 4.0 V.

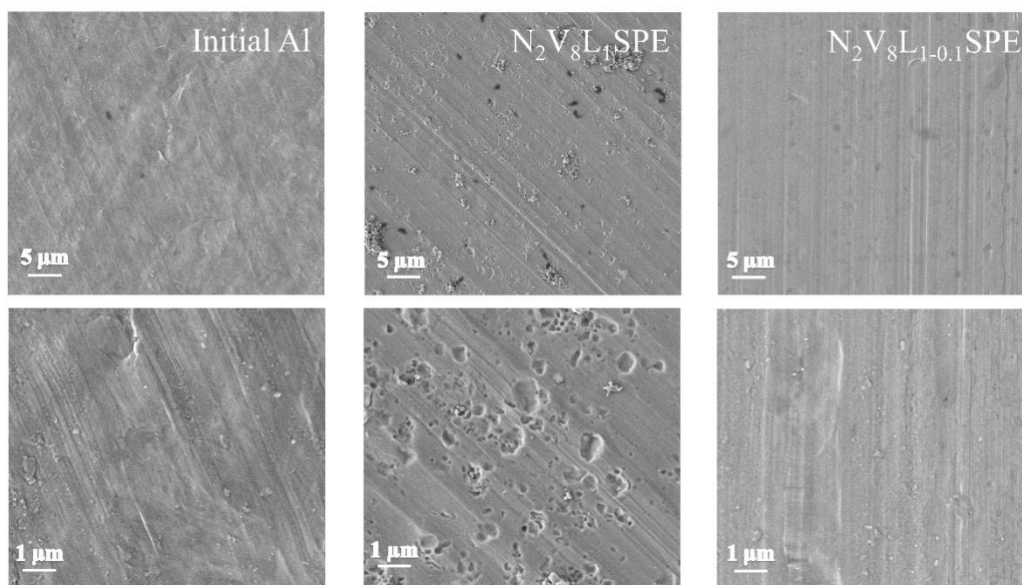

**Fig. S14.** SEM images of (a) the initial Al collector and the cycled Al collectors with (b)  $N_2V_8L_1$  SPE and (c)  $N_2V_8L_{1-0.1}$  SPE after 300 cycles.

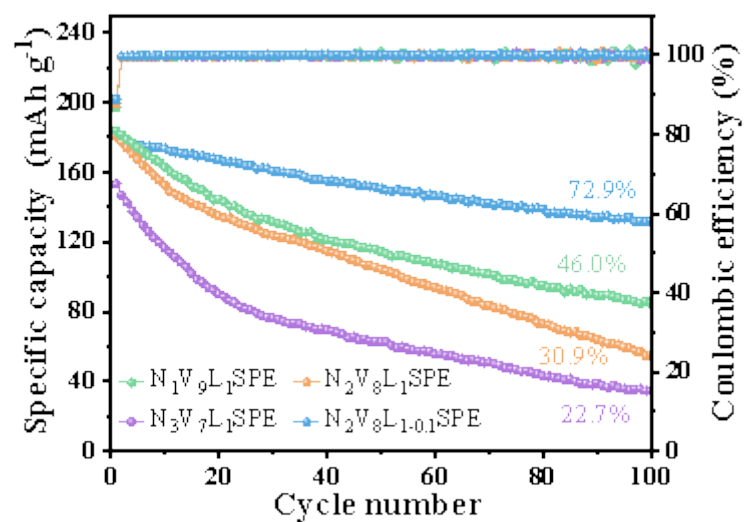

**Fig. S15.** Cycling stability of Li||NCM811 cells with  $N_1V_9L_1$ ,  $N_2V_8L_1$ ,  $N_3V_7L_1$  and  $N_2V_8L_{1-0.1}$  SPEs at 0.5 C.



**Table S1.** Comparison of crosslinking degrees of SPEs.

| SPEs                                             | T2A (ms) | T2B (ms) | Crosslinking percentage (%) | Pendulum chain percentage (%) | Crosslinking density (*E-4mol/ml) |
|--------------------------------------------------|----------|----------|-----------------------------|-------------------------------|-----------------------------------|
| N <sub>1</sub> V <sub>9</sub> L <sub>1</sub>     | 18.12    | 847.53   | 4.44                        | 95.56                         | 0.043                             |
| N <sub>2</sub> V <sub>8</sub> L <sub>1</sub>     | 62.12    | 415.11   | 9.19                        | 90.81                         | 0.044                             |
| N <sub>3</sub> V <sub>7</sub> L <sub>1</sub>     | 11.49    | 52.22    | 13                          | 87                            | 0.351                             |
| N <sub>2</sub> V <sub>8</sub> L <sub>1-0.1</sub> | 27.51    | 108.56   | 17.47                       | 82.53                         | 0.17                              |

**Table. S2.** The mechanical property data for N<sub>2</sub>V<sub>8</sub>L<sub>1-0.1</sub> SPE, N<sub>2</sub>V<sub>8</sub>L<sub>1</sub> SPE and PVDF-HFP memabrane.

| SPEs                                                 | Young's modulus (MPa) | Elongation at break (%) | Tensile Strength (MPa) | Tensile Fracture Stress (MPa) |
|------------------------------------------------------|-----------------------|-------------------------|------------------------|-------------------------------|
| N <sub>2</sub> V <sub>8</sub> L <sub>1-0.1</sub> SPE | 10.77                 | 120.71                  | 12.18                  | 7.32                          |
| N <sub>2</sub> V <sub>8</sub> L <sub>1</sub> SPE     | 9.31                  | 124.22                  | 11.1                   | 7.91                          |
| PVDF-HFP                                             | 6.23                  | 211.2                   | 9.71                   | 5.85                          |

**Table S3.** Impedance data of different Li||LFP cells.

| Style                                                       | Before cycle          |                             | After cycle           |                             |
|-------------------------------------------------------------|-----------------------|-----------------------------|-----------------------|-----------------------------|
|                                                             | R <sub>bulk</sub> (Ω) | R <sub>interphase</sub> (Ω) | R <sub>bulk</sub> (Ω) | R <sub>interphase</sub> (Ω) |
| Li N <sub>1</sub> V <sub>9</sub> L <sub>1</sub> SPE LFP     | 4.8                   | 147.48                      | 4.8                   | 276.8                       |
| Li N <sub>2</sub> V <sub>8</sub> L <sub>1</sub> SPE LFP     | 16.1                  | 153.4                       | 14.2                  | 197.4                       |
| Li N <sub>3</sub> V <sub>7</sub> L <sub>1</sub> SPE LFP     | 18.0                  | 272.1                       | 19.11                 | 295.7                       |
| Li N <sub>2</sub> V <sub>8</sub> L <sub>1-0.1</sub> SPE LFP | 10.5                  | 160.1                       | 9.1                   | 157.2                       |

**Table. S4.** Electrochemical performance of different SPEs reported in literature.

| SPE ingredients                                                 | Voltage window (V) | Room temperature ionic conductivity (10 <sup>-4</sup> S·cm <sup>-1</sup> ) | Cell(cycles)capacity retention/C-rate |
|-----------------------------------------------------------------|--------------------|----------------------------------------------------------------------------|---------------------------------------|
| Ni <sub>3</sub> B <sub>2</sub> O <sub>3</sub> /PEO <sup>1</sup> | 6.00               | 0.85                                                                       | Li  LFP (80 th)<br>97.5%/0.2 C        |
| LiFSI-DOL <sup>2</sup>                                          | 4.70               | 7.90                                                                       | Li  LFP (500 th)<br>69.3%/1 C         |
| Pyr <sub>14</sub> TFSI/PEO <sup>3</sup>                         | 4.50               | 3.98                                                                       | Li  LFP (100 th)<br>82.9%/0.5 C       |
| PEO-LiPCSI <sup>4</sup>                                         | 5.53               | /                                                                          | Li  LFP (85 th)<br>80%/0.1 C          |
| Poly (diethylene)                                               | /                  | 1.6                                                                        | LFP  Li (100 th)                      |

|                                       |      |      |                                    |
|---------------------------------------|------|------|------------------------------------|
| glycol carbonate) <sup>5</sup>        |      |      | 95%/0.2 C                          |
| PCL-LiTFSI <sup>6</sup>               | 4.6  | 0.25 | NCM622  Li (100 th)<br>81.6%/0.1 C |
| LiTFPB/P(PO/EM) <sup>7</sup>          | 4.6  | 1.55 | Li  LFMP (100th)<br>88.7%/0.1 C    |
| PEO/LDH <sup>8</sup>                  | 5    | 1.1  | Li  LFP (100 th)<br>88%/0.2 C      |
| PEO-LATP <sup>9</sup>                 | 5    | 0.12 | Li  LFP (50 th)<br>84%/0.1 C       |
| UV-PCCE <sup>10</sup>                 | 4.78 | 9.1  | Li  LFP (180 th)<br>83.9%/0.5 C    |
| PEO-cPTFBC <sup>11</sup>              | 4.7  | 2.2  | Li  LFP (150 th)<br>98.2%/0.1 C    |
| NPGDA-VEC/PVDF-<br>HFP<br>(This work) | 5.10 | 2.64 | Li  LFP (1400 th)<br>98.4%/0.5 C   |

## References

- 1 Z. Guo, Y. Wu, X. Li, X. Wu, Q. Hu, Z. Wang, H. Guo, W. Peng, G. Yan and J. Wang, *Ionics*, 2022, **28**, 779–788.
- 2 H. Cheng, J. Zhu, H. Jin, C. Gao, H. Liu, N. Cai, Y. Liu, P. Zhang and M. Wang, *Mater. Today Energy*, 2021, **20**, 100623.
- 3 L. Tian, M. Wang, Y. Liu, Z. Su, B. Niu, Y. Zhang, P. Dong and D. Long, *J. Power Sources*, 2022, **543**, 231848.
- 4 H. Yuan, J. Luan, Z. Yang, J. Zhang, Y. Wu, Z. Lu and H. Liu, *ACS Appl. Mater. Interfaces*, 2020, **12**, 7249–7256.
- 5 X. Liu, G. Ding, X. Zhou, S. Li, W. He, J. Chai, C. Pang, Z. Liu and G. Cui, *J. Mater. Chem. A*, 2017, **5**, 11124–11130.
- 6 Y. Seo, Y.-C. Jung, M.-S. Park and D.-W. Kim, *J. Membr. Sci.*, 2020, **603**, 117995.
- 7 Q. Wang, Z. Cui, Q. Zhou, X. Shangguan, X. Du, S. Dong, L. Qiao, S. Huang, X. Liu, K. Tang, X. Zhou and G. Cui, *Energy Storage Mater.*, 2020, **25**, 756–763.
- 8 Q. Wang, J.-F. Wu, Z.-Y. Yu and X. Guo, *Solid State Ion.*, 2020, **347**, 115275.
- 9 L. Liu, L. Chu, B. Jiang and M. Li, *Solid State Ion.*, 2019, **331**, 89–95.
- 10 Y. Lu, K.-W. He, S.-J. Zhang, Y.-X. Zhou and Z.-B. Wang, *Ionics*, 2019, **25**, 1607–1615.
- 11 Q. Wang, X. Liu, Z. Cui, X. Shangguan, H. Zhang, J. Zhang, K. Tang, L. Li, X. Zhou and G. Cui, *Electrochimica Acta*, 2020, **337**, 135843.
