# Supplementary figures and images for: Long-stable lithium metal batteries with a high-performance dual-salt solid polymer electrolyte
Source: Royal Society of Chemistry journal article supplement (doi:10.1039/d4py00741g), 2024-01-01

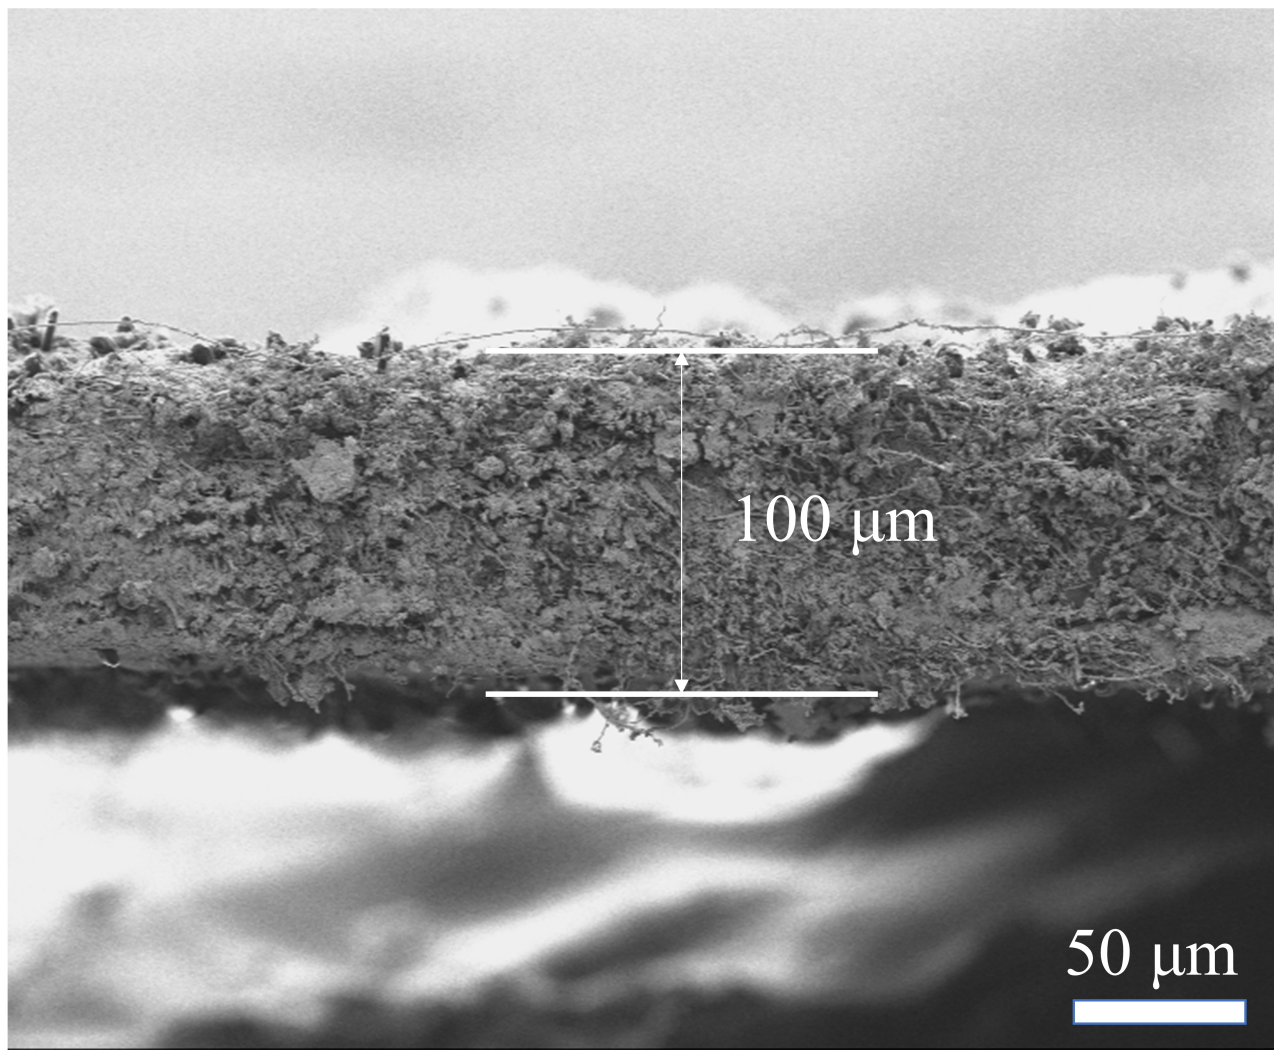

Supplement: d4py00741g10.pdf [file d4py00741g10.pdf]

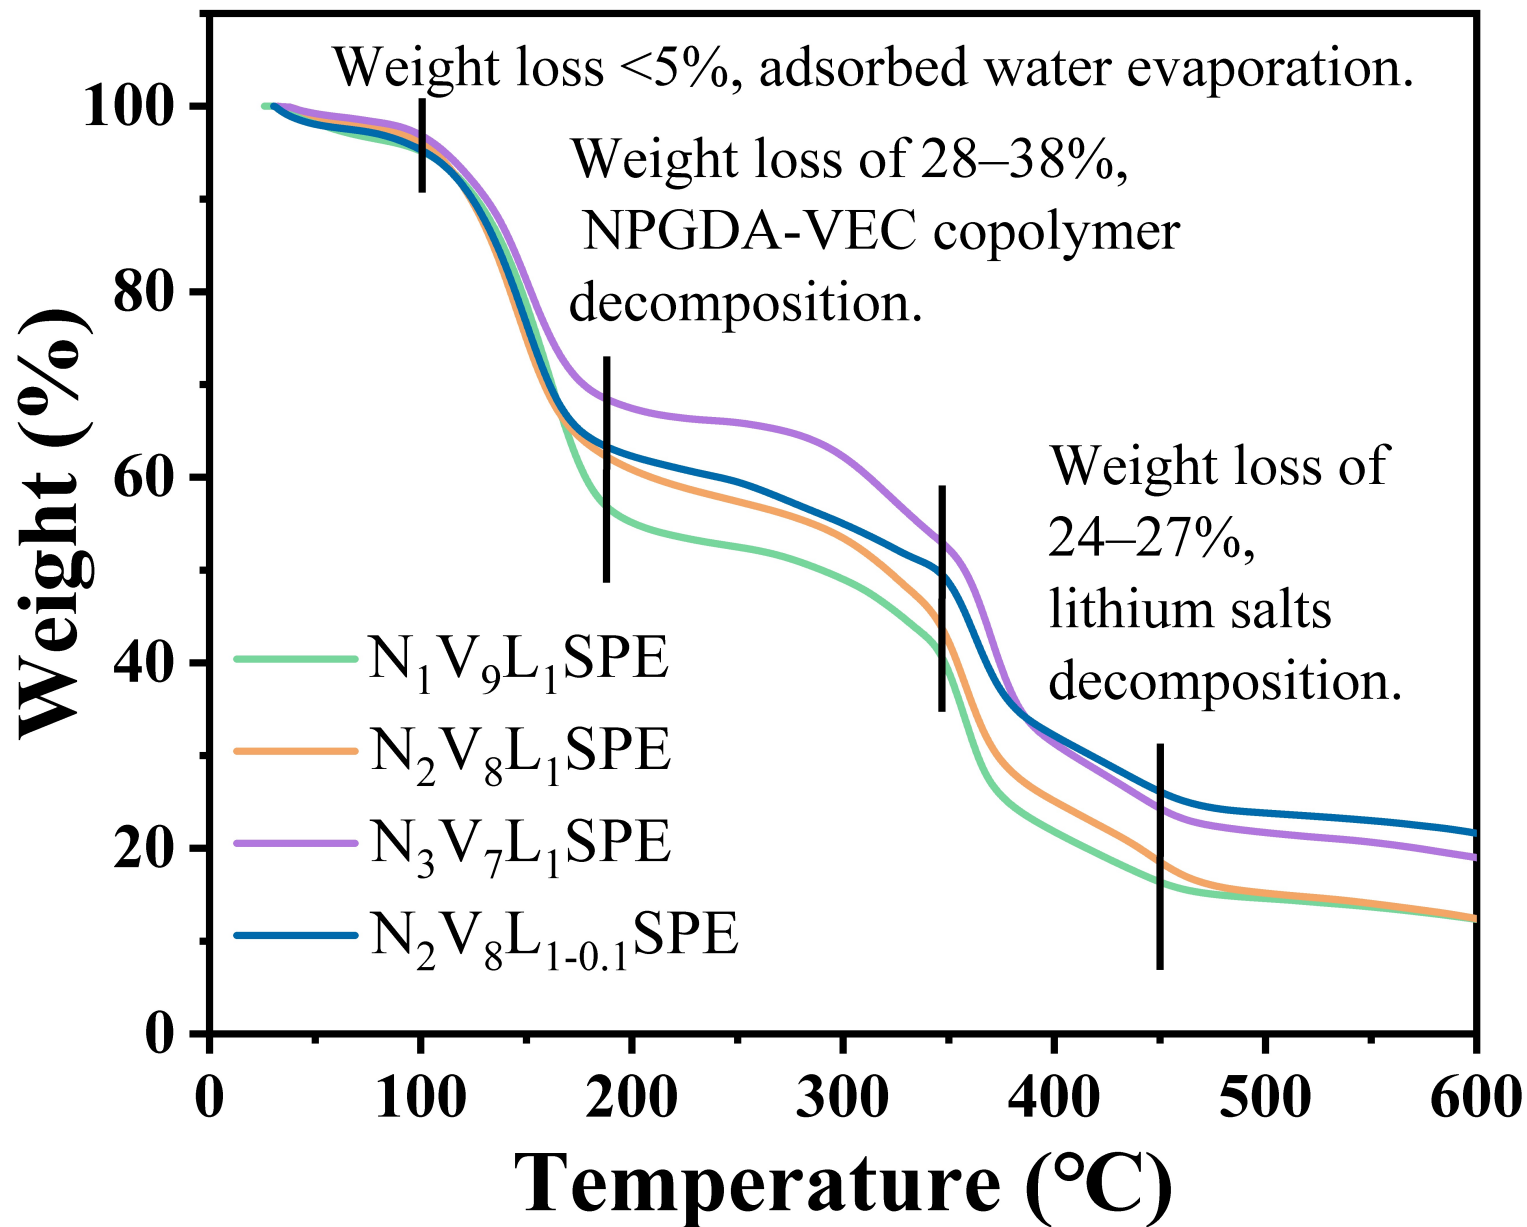

Supplement: d4py00741g11.pdf [file d4py00741g11.pdf]

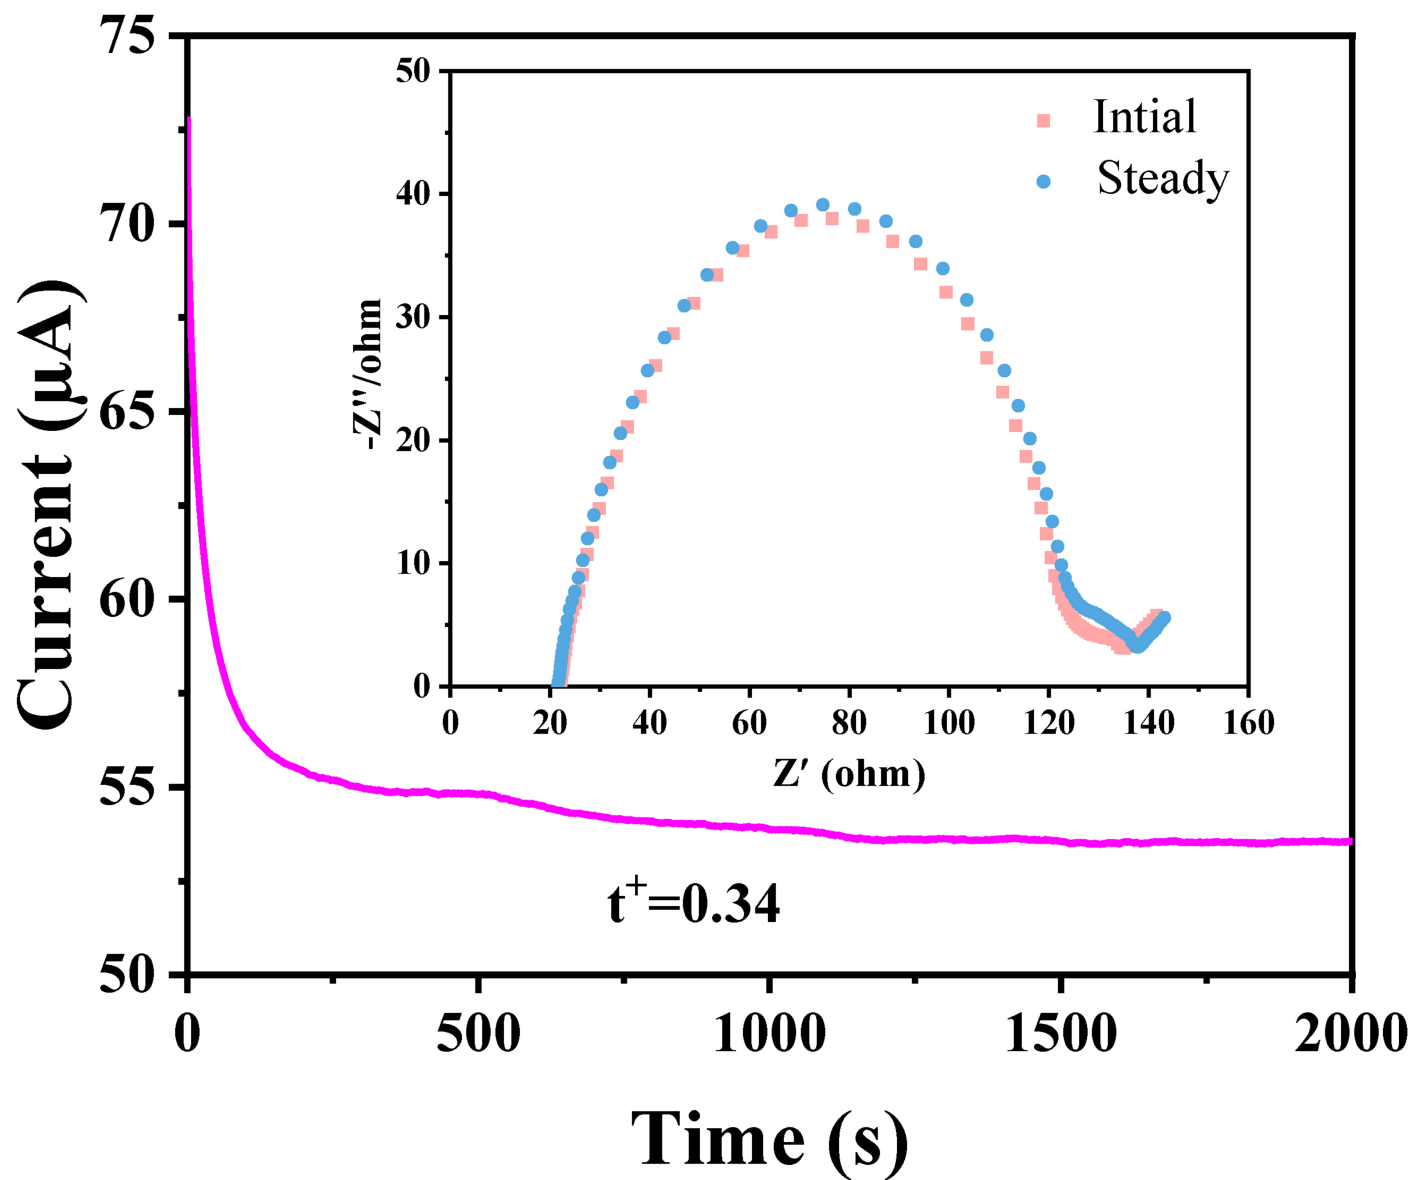

Supplement: d4py00741g12.pdf [file d4py00741g12.pdf]

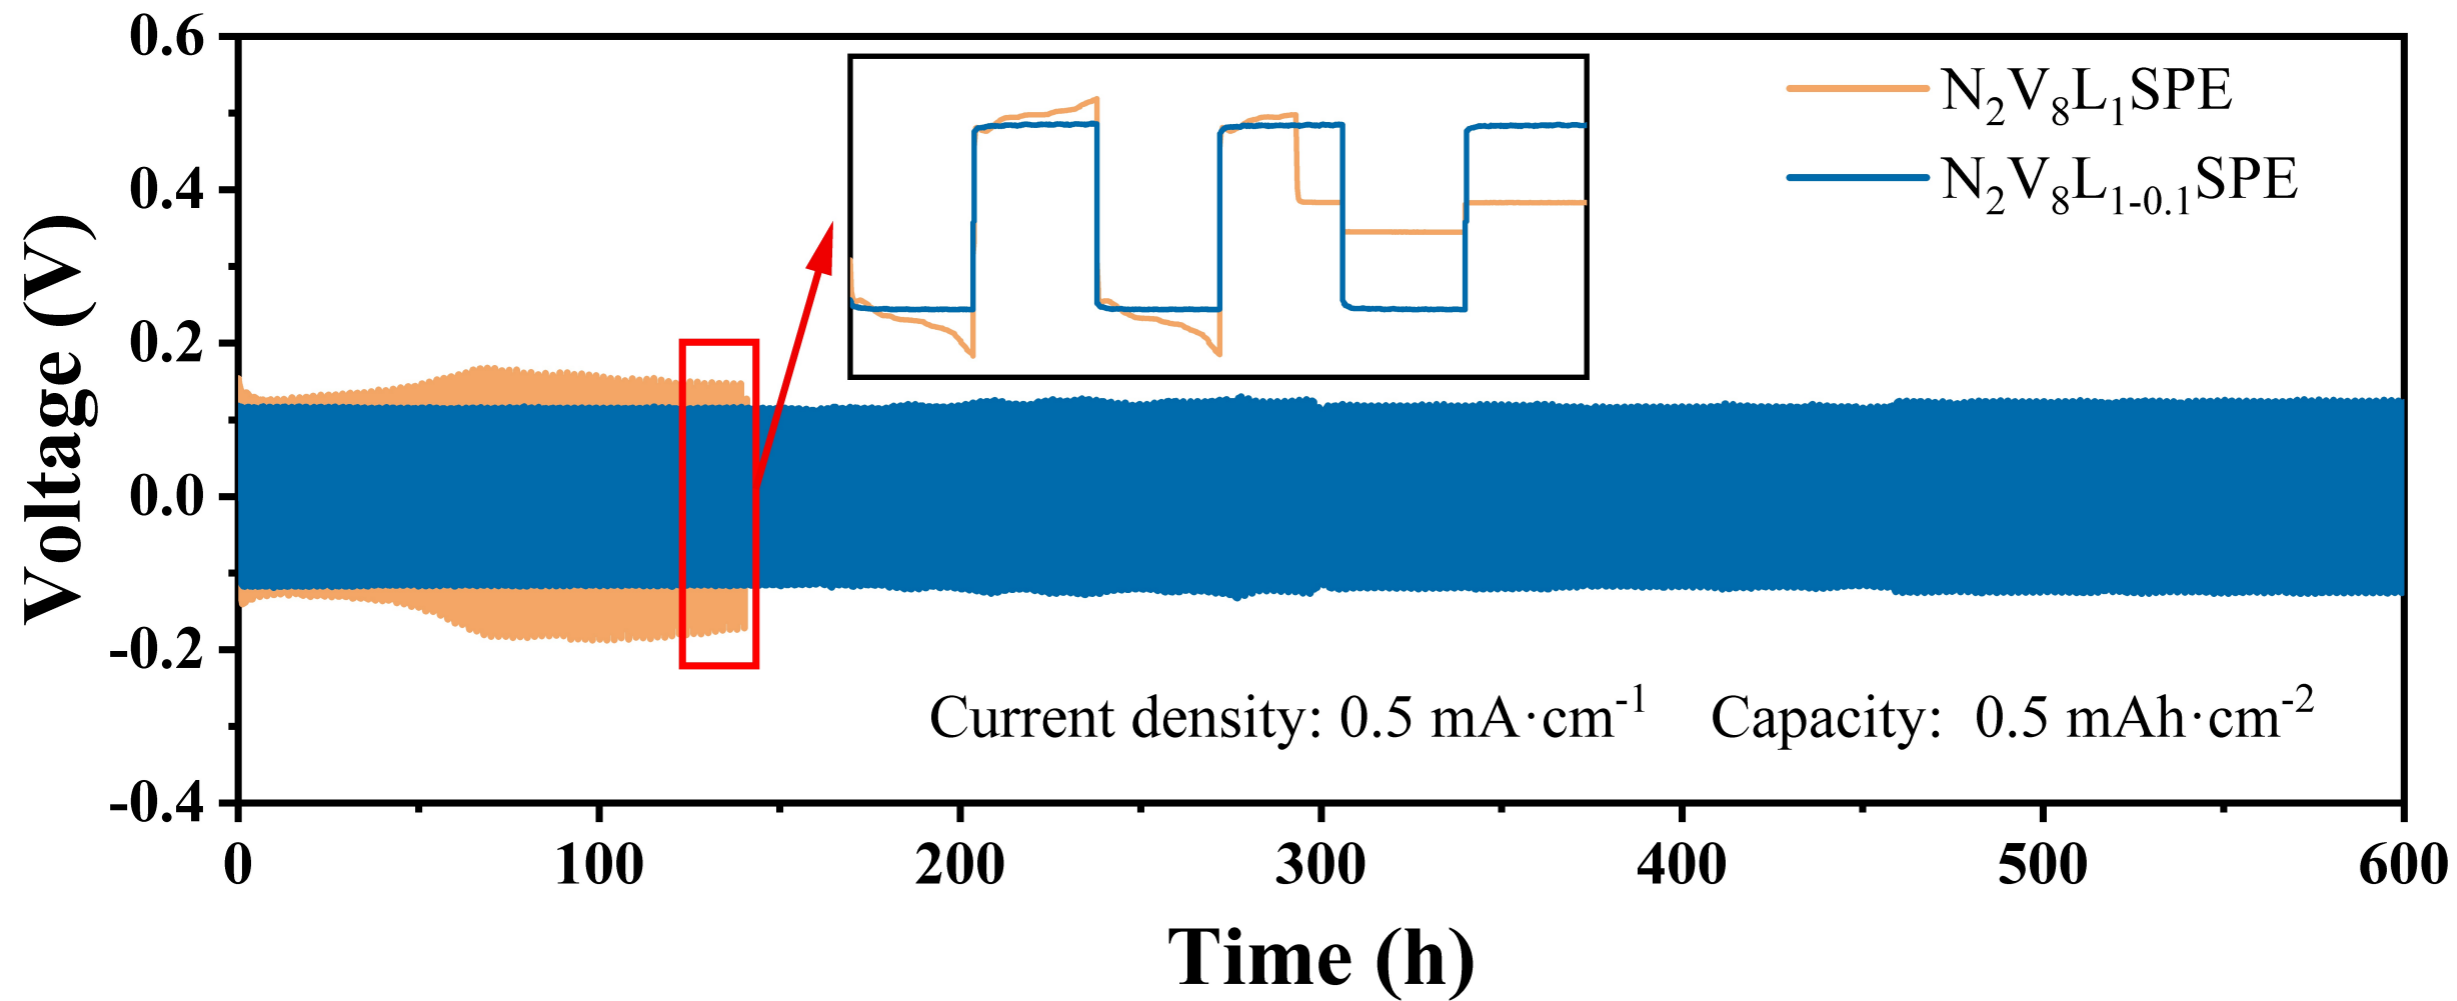

Supplement: d4py00741g13.pdf [file d4py00741g13.pdf]

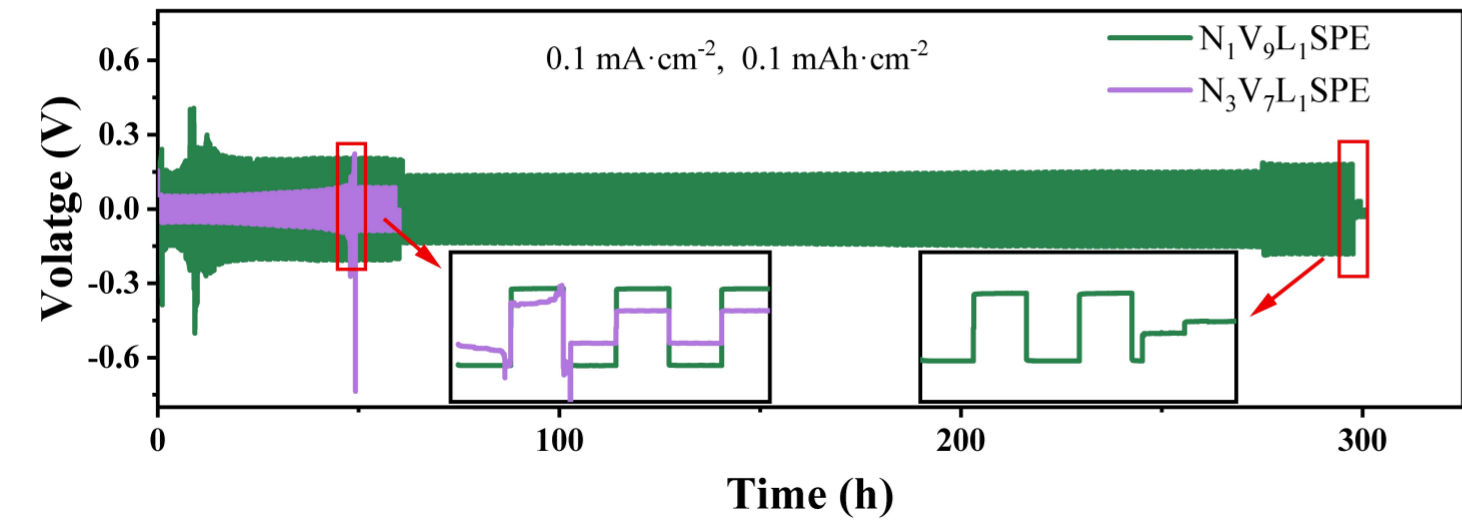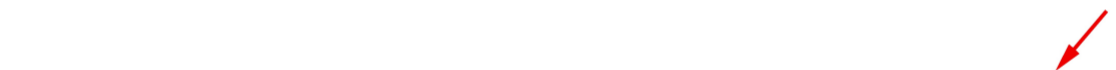

Supplement: d4py00741g14.pdf [file d4py00741g14.pdf]

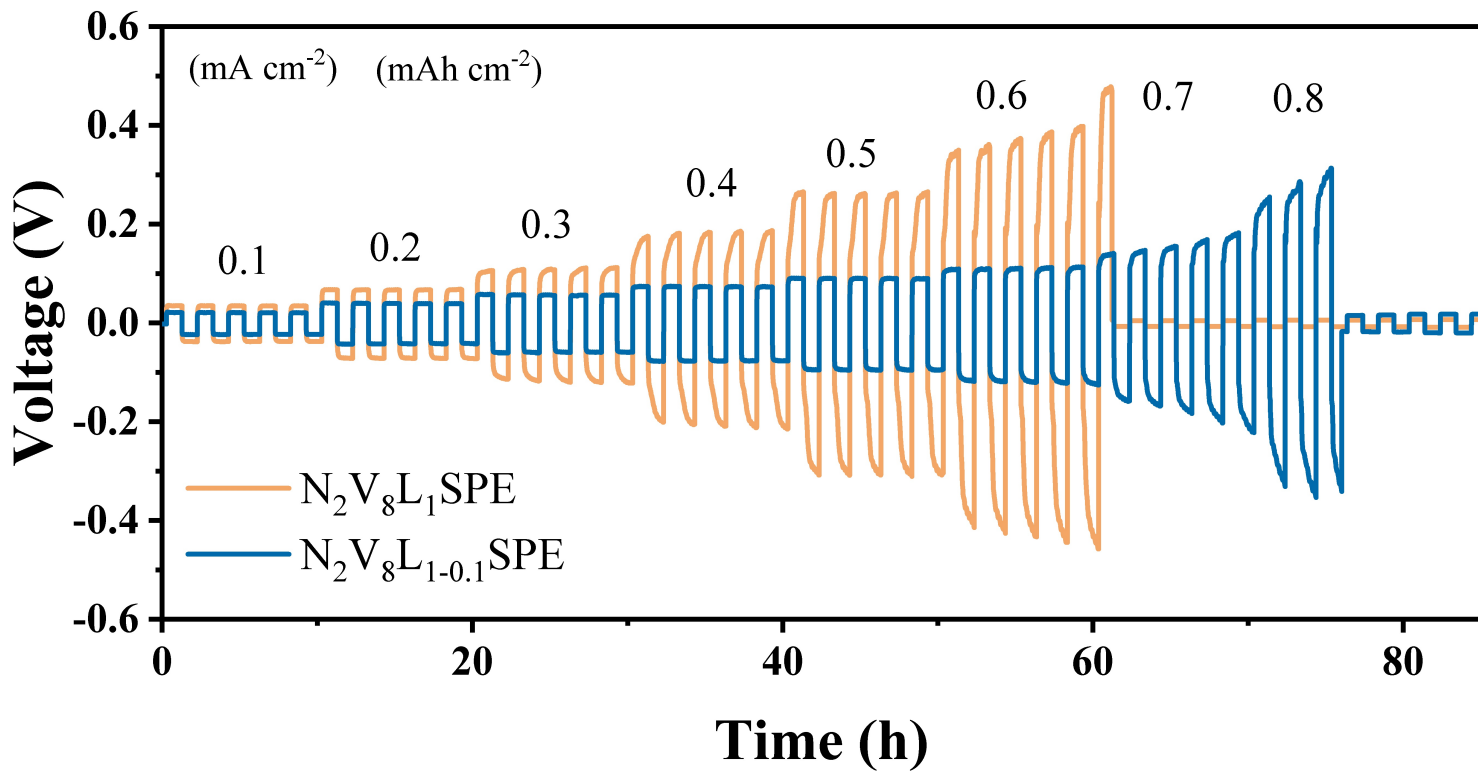

Supplement: d4py00741g15.pdf [file d4py00741g15.pdf]

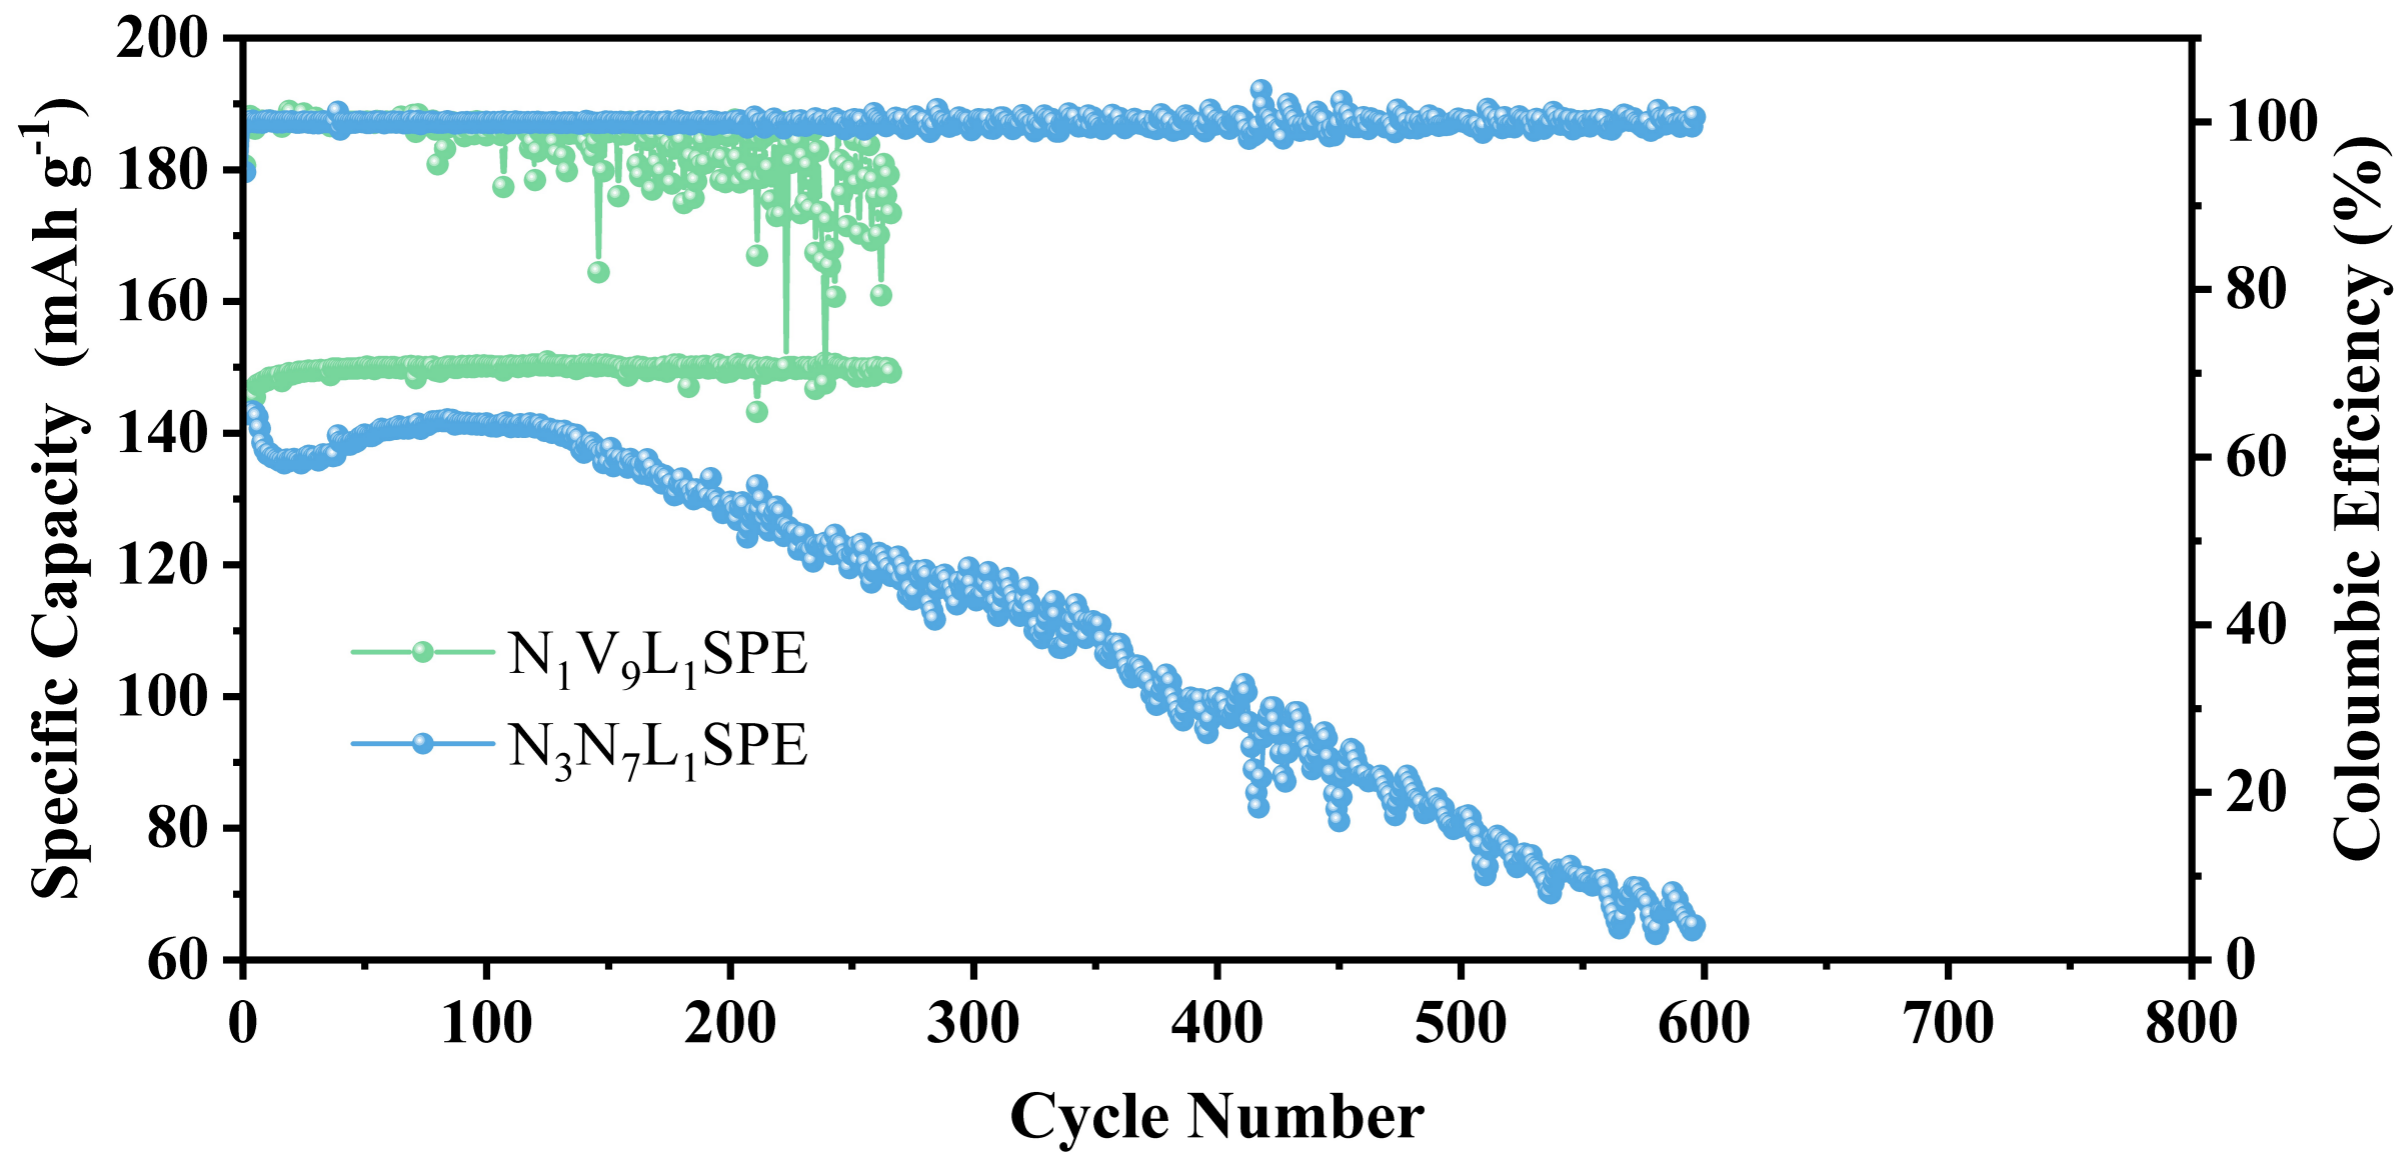

Supplement: d4py00741g16.pdf [file d4py00741g16.pdf]

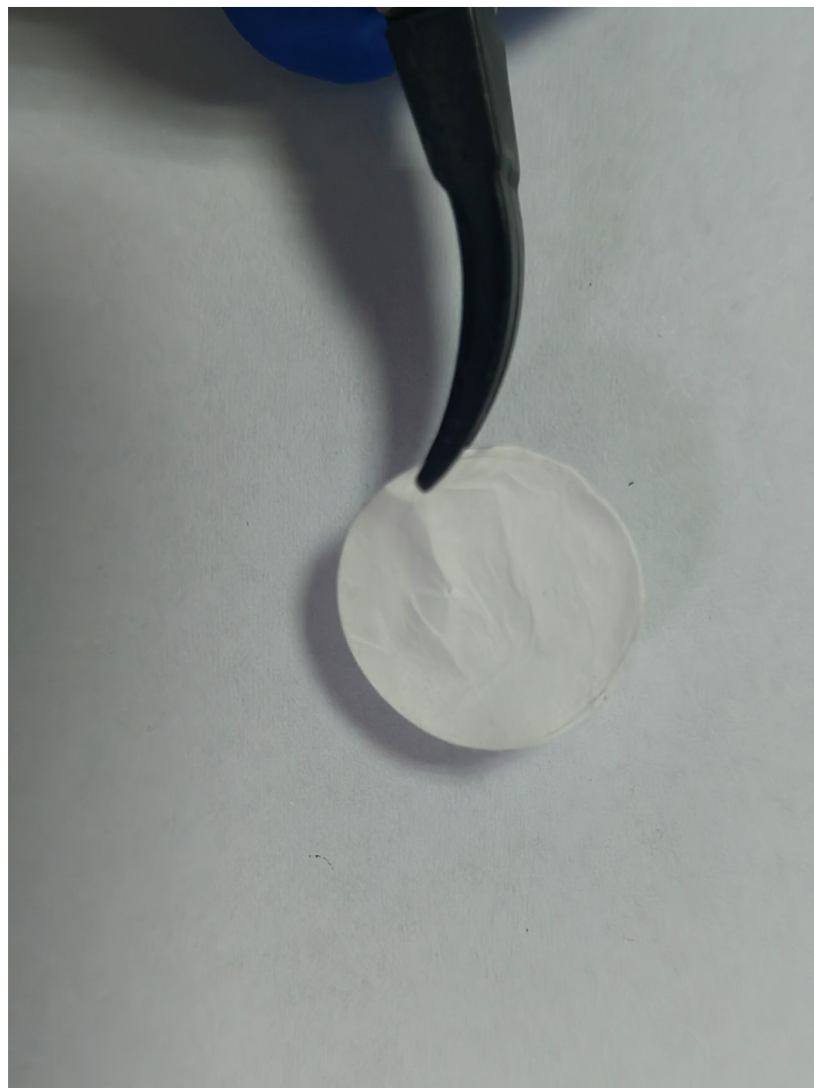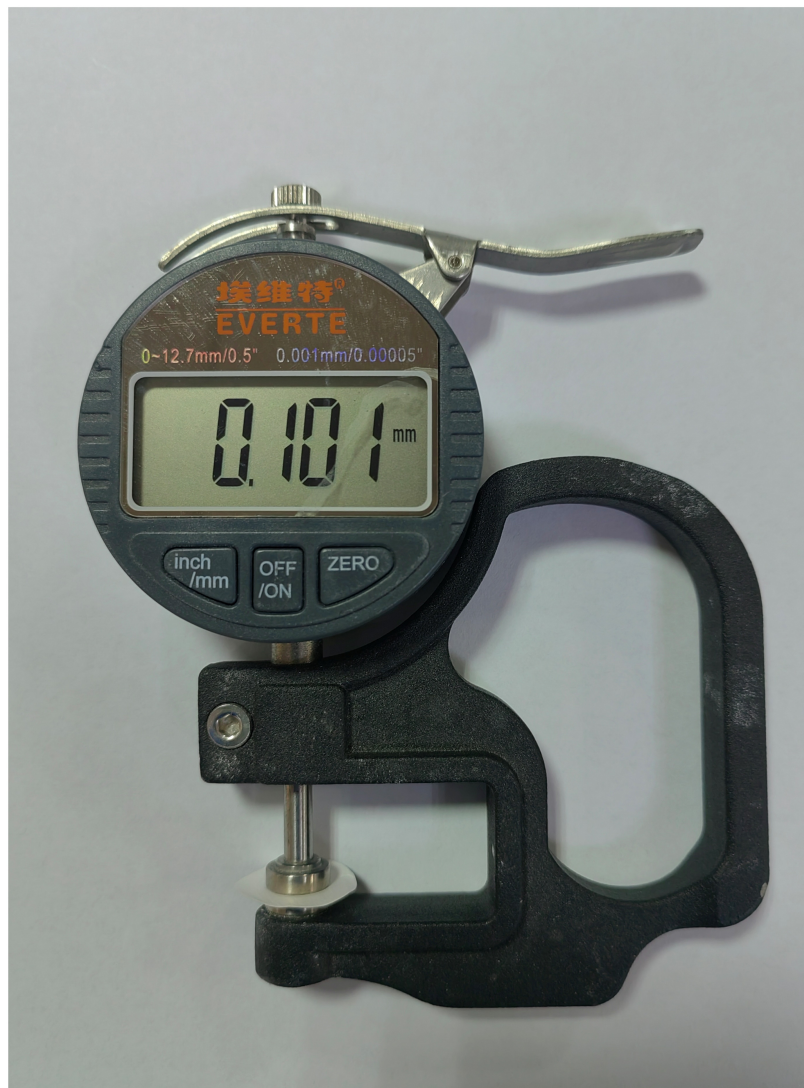

Supplement: d4py00741g2.pdf [file d4py00741g2.pdf]

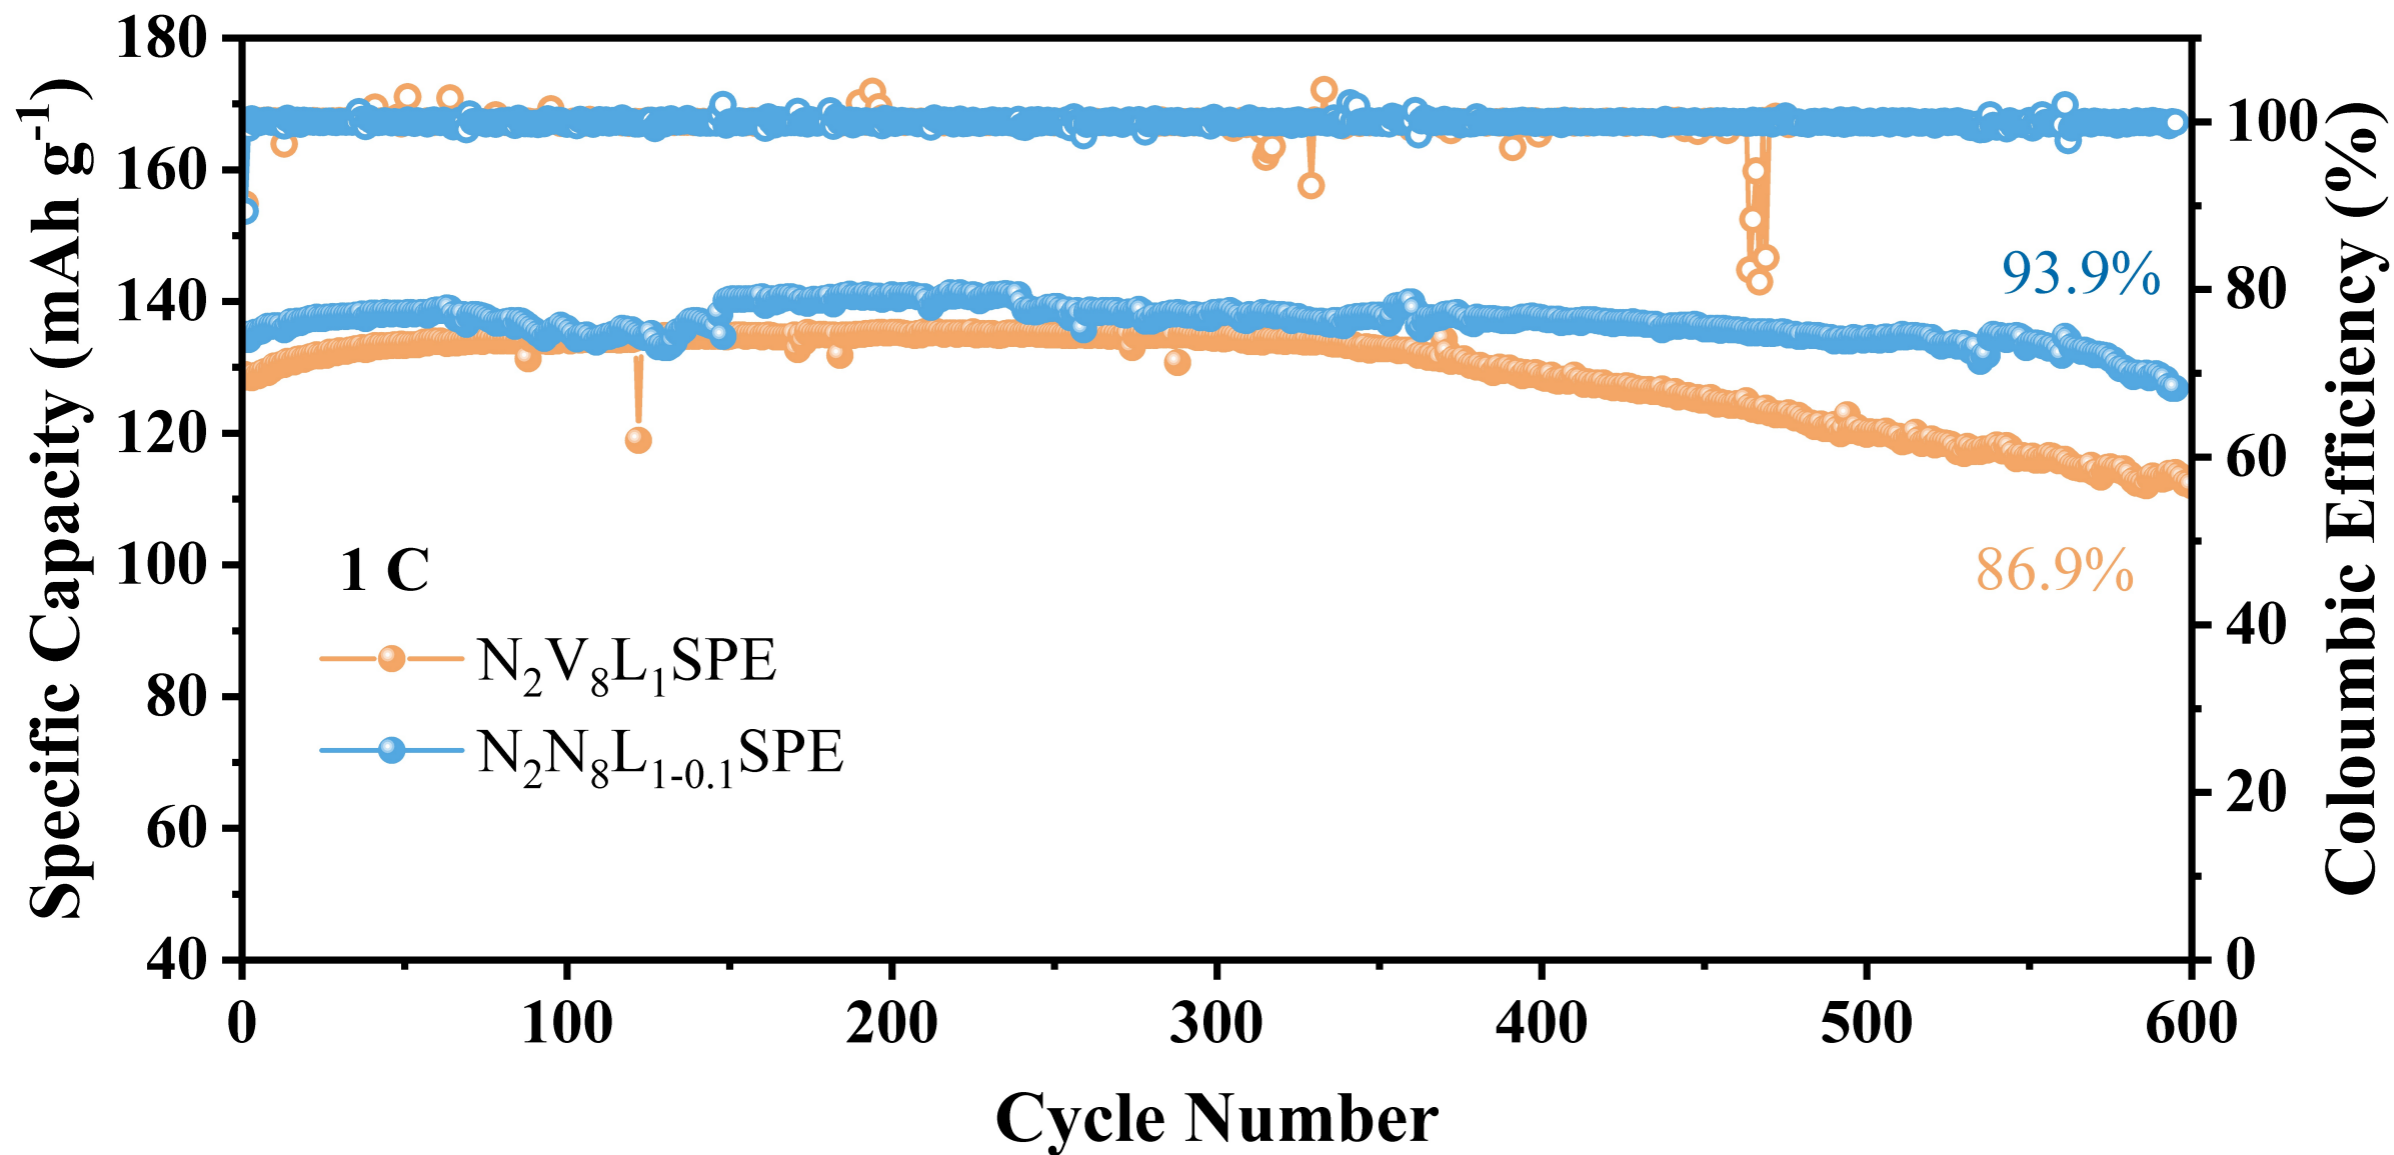

Supplement: d4py00741g3.pdf [file d4py00741g3.pdf]

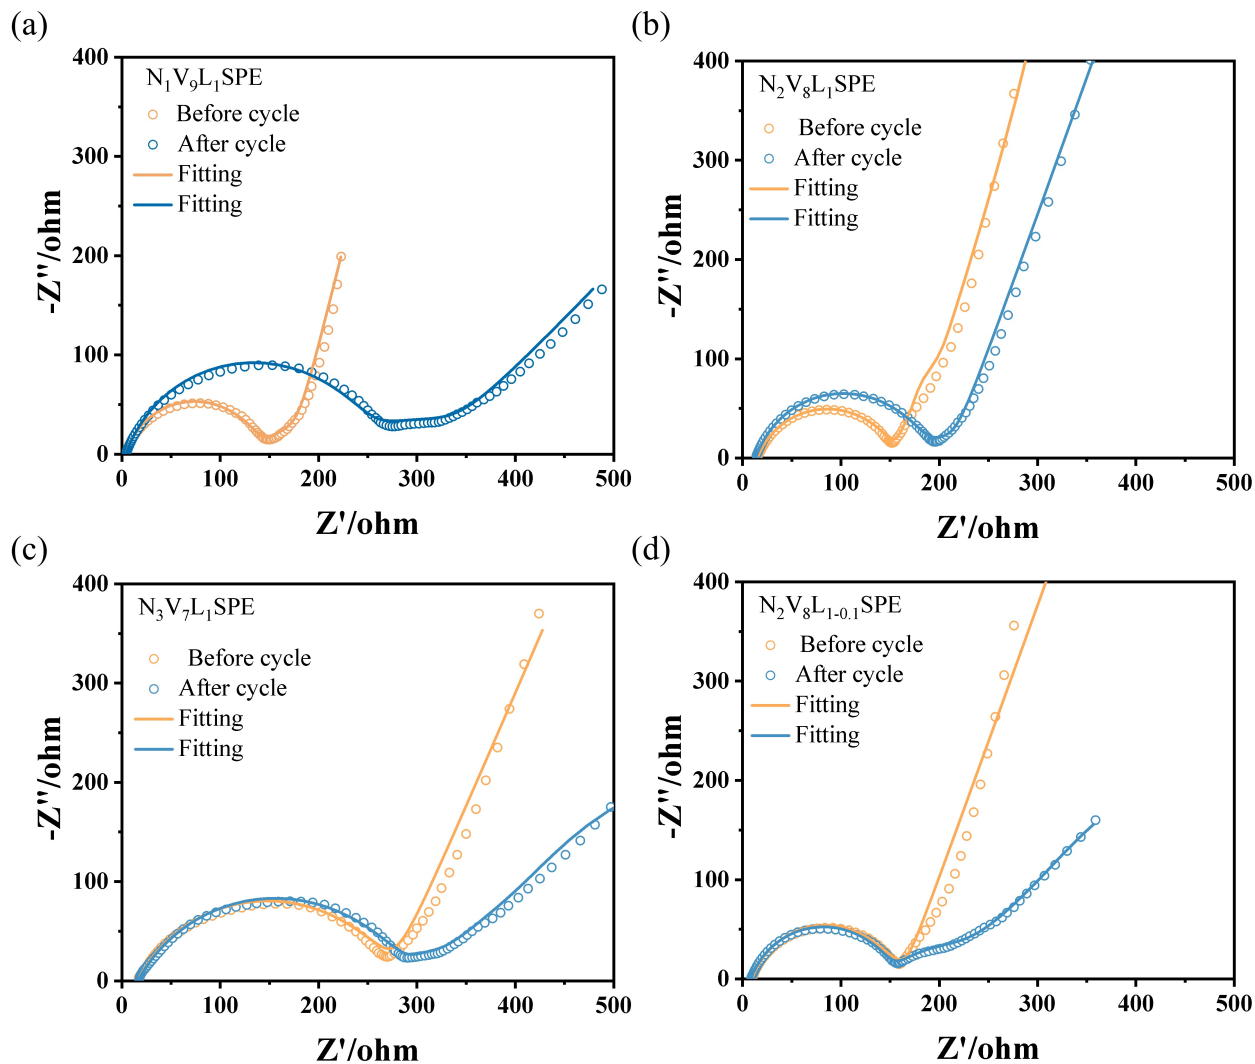

Supplement: d4py00741g4.pdf [file d4py00741g4.pdf]

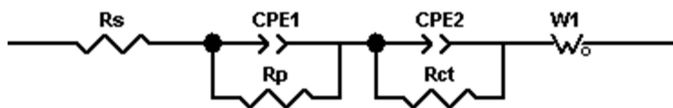

Supplement: d4py00741g5.pdf [file d4py00741g5.pdf]

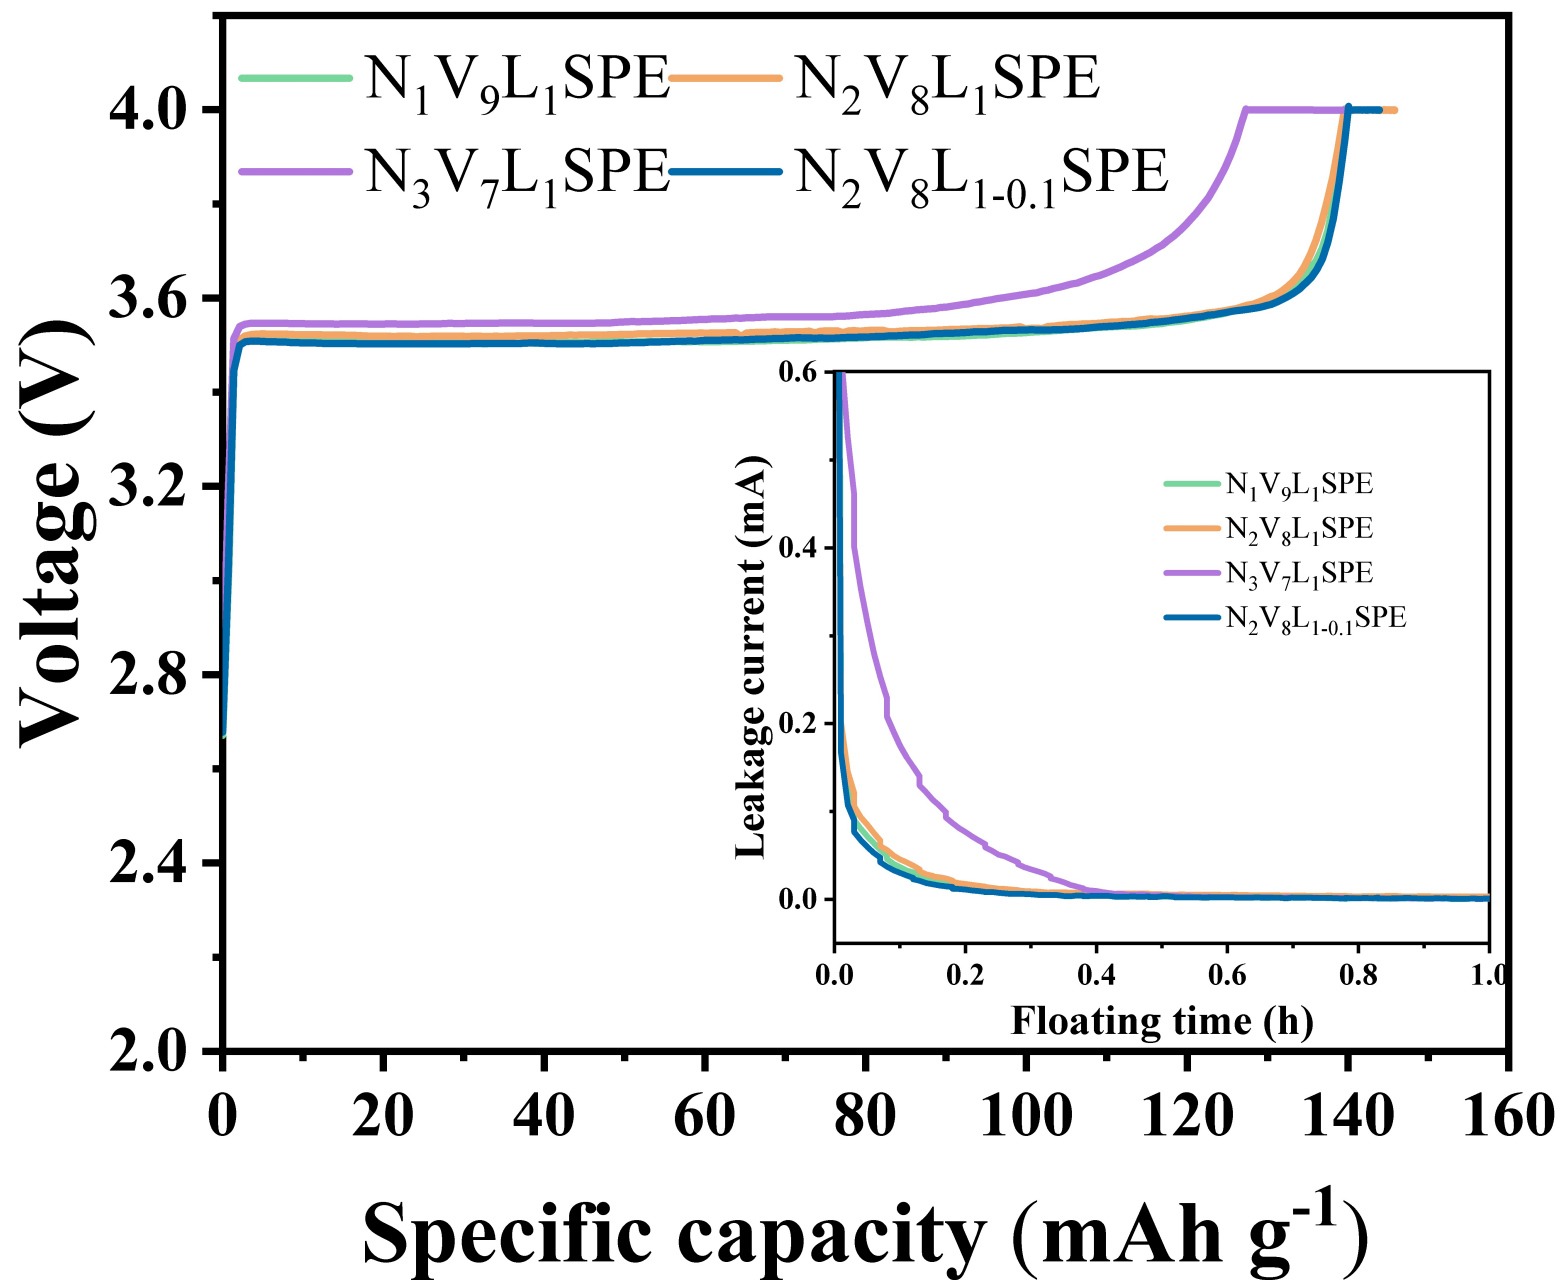

Supplement: d4py00741g6.pdf [file d4py00741g6.pdf]

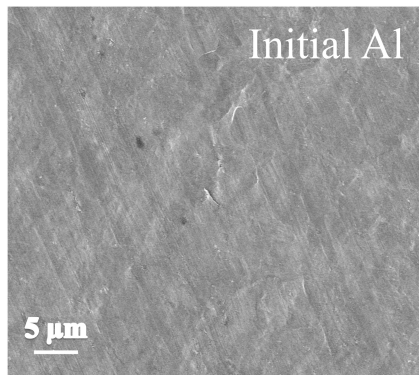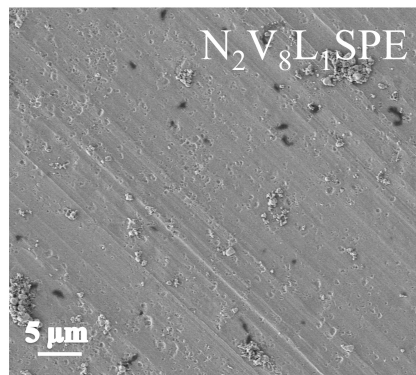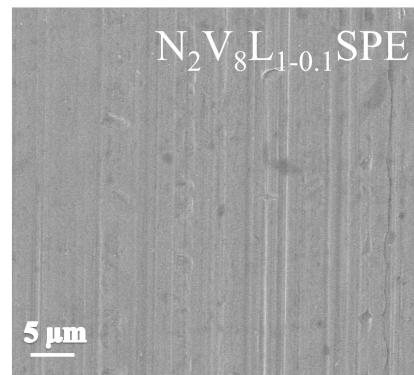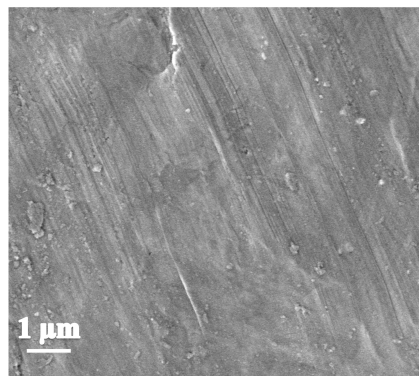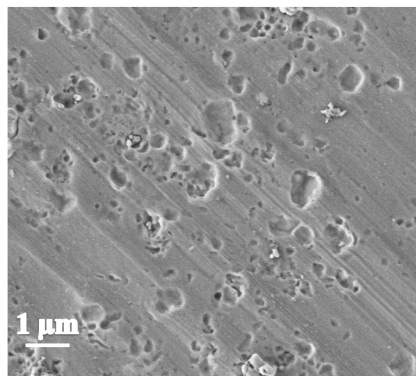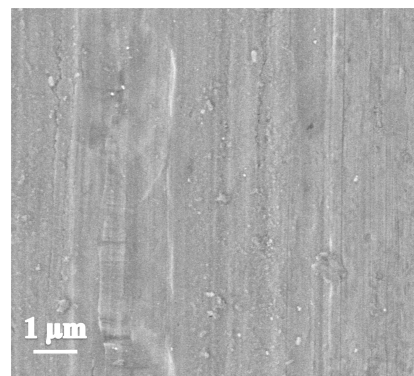

Supplement: d4py00741g7.pdf [file d4py00741g7.pdf]

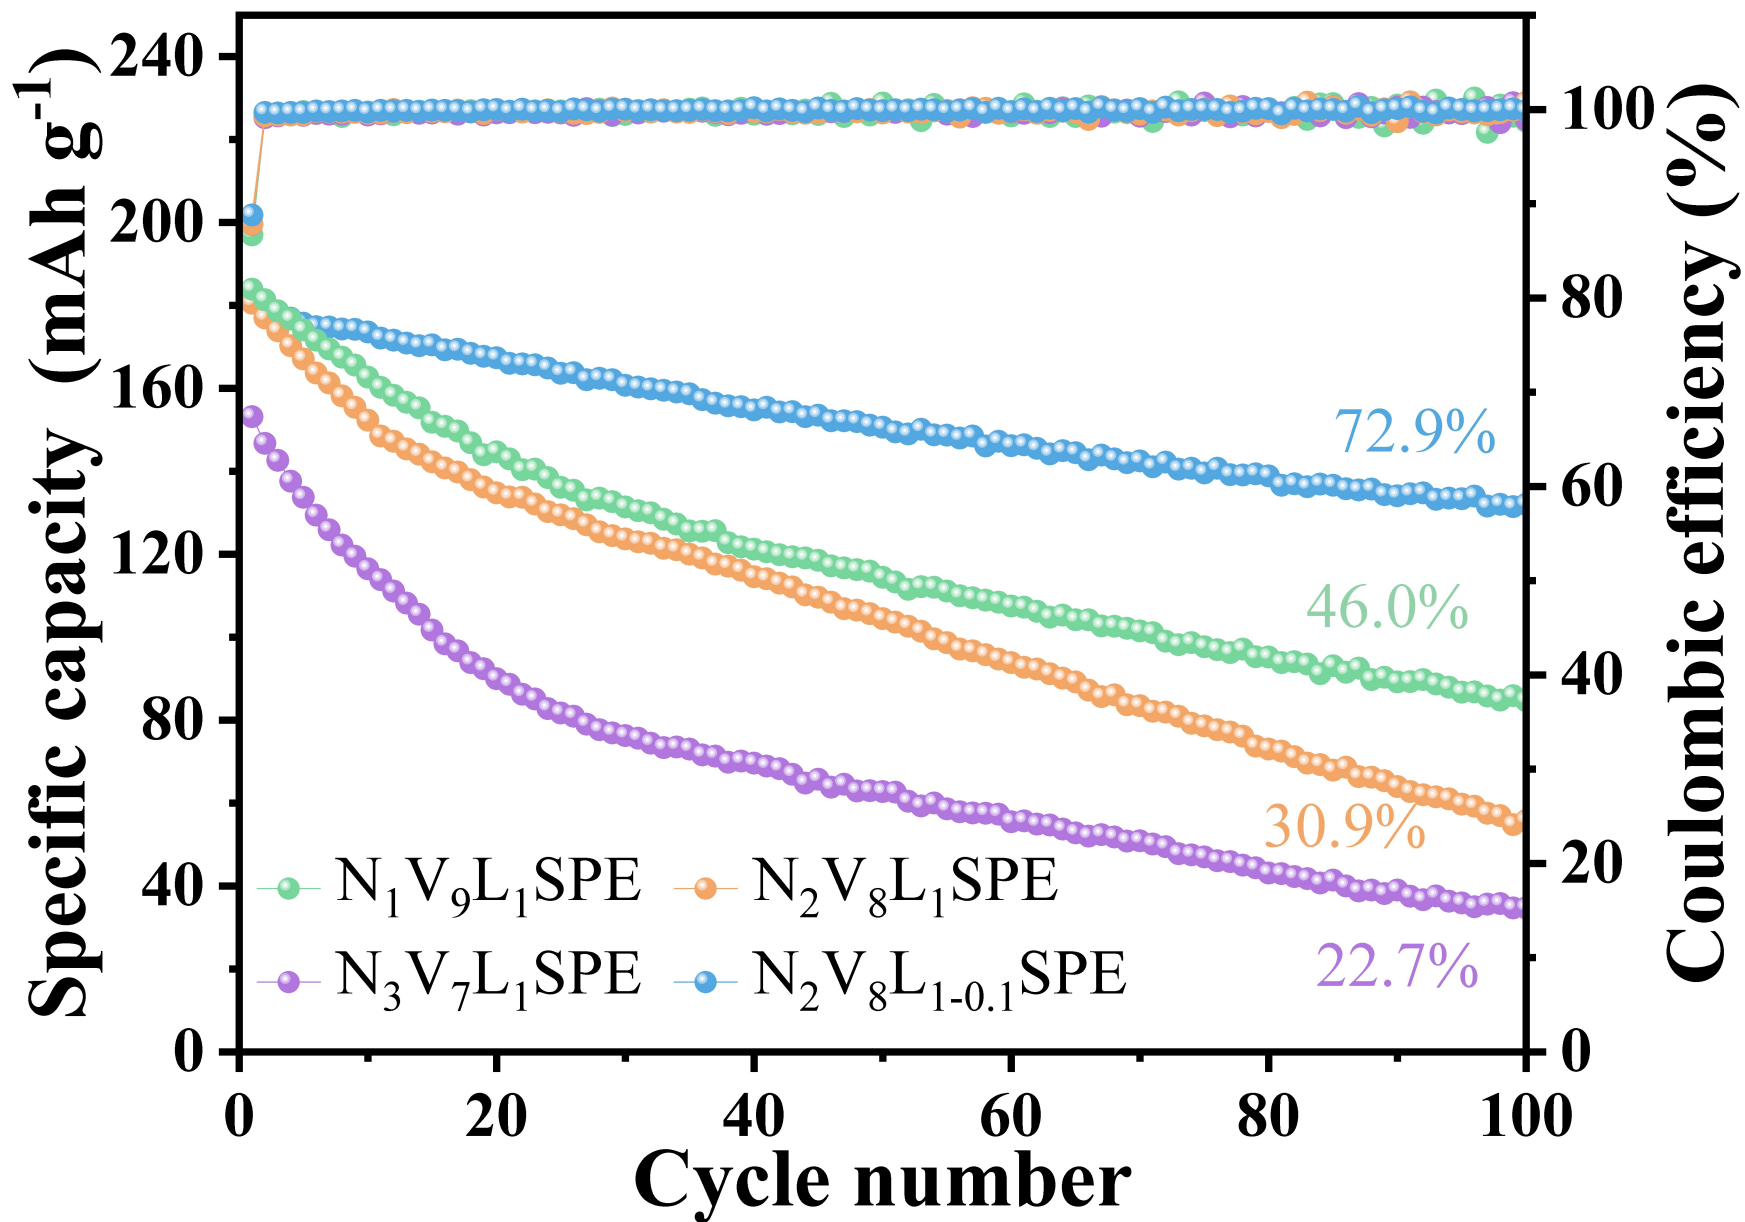

Supplement: d4py00741g8.pdf [file d4py00741g8.pdf]

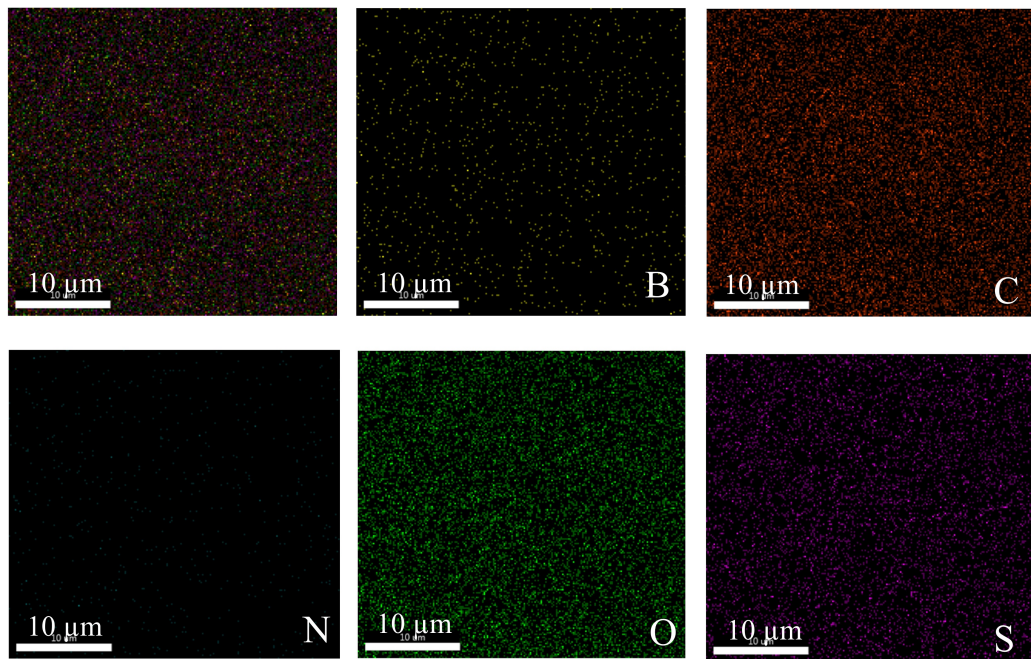

Supplement: d4py00741g9.pdf [file d4py00741g9.pdf]
